# Supplementary material for: Hypoxic burden to guide CPAP treatment allocation in patients with obstructive sleep apnoea: a post hoc study of the ISAACC trial
Source: PubMed Central journal article supplement — Eur Respir J. 2023 Dec 7;62(6):2300828. doi: 10.1183/13993003.00828-2023 (PMC10701092; doi:10.1183/13993003.00828-2023), 2023-12-07
Supplement: ERJ-00828-2023.Shareable.pdf [file ERJ-00828-2023.Shareable.pdf]

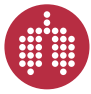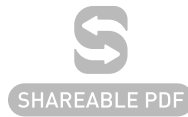

# Hypoxic burden to guide CPAP treatment allocation in patients with obstructive sleep apnoea: a *post hoc* study of the ISAACC trial

Lucía Pinilla <sup>1,2,3,17</sup>, Neda Esmaeili <sup>3,4,17</sup>, Gonzalo Labarca <sup>3</sup>, Miguel Ángel Martínez-García <sup>2,5</sup>, Gerard Torres <sup>1,2</sup>, Esther Gracia-Lavedan <sup>2,6</sup>, Olga Mínguez <sup>6</sup>, Dolores Martínez <sup>6</sup>, Jorge Abad <sup>2,7</sup>, María José Masdeu <sup>2,8</sup>, Olga Mediano <sup>2,9</sup>, Carmen Muñoz <sup>10</sup>, Valentín Cabriada <sup>11</sup>, Joaquín Duran-Cantolla <sup>2,12</sup>, Mercè Mayos <sup>12,13</sup>, Ramón Coloma <sup>14</sup>, Josep María Montserrat <sup>2,15</sup>, Mónica de la Peña <sup>16</sup>, Wen-Hsin Hu <sup>3</sup>, Ludovico Messineo <sup>3</sup>, Mohammadreza Sehhati <sup>4</sup>, Andrew Wellman <sup>3</sup>, Susan Redline <sup>3</sup>, Scott Sands <sup>3</sup>, Ferran Barbé <sup>2,6</sup>, Manuel Sánchez-de-la-Torre <sup>1,2,18</sup> and Ali Azarbarzin <sup>18</sup>

<sup>1</sup>Group of Precision Medicine in Chronic Diseases, University Hospital Arnau de Vilanova and Santa María, University of Lleida, IRBLleida, Lleida, Spain. <sup>2</sup>Centro de Investigación Biomédica en Red de Enfermedades Respiratorias (CIBERES), Instituto de Salud Carlos III, Madrid, Spain. <sup>3</sup>Division of Sleep and Circadian Disorders, Brigham and Women's Hospital and Harvard Medical School, Boston, MA, USA. <sup>4</sup>Bioelectric and Biomedical Engineering Department, School of Advanced Technologies in Medicine, Isfahan University of Medical Sciences, Isfahan, Iran. <sup>5</sup>Pneumology Department, Hospital Universitario y Politécnico La Fe, Valencia, Spain. <sup>6</sup>Group of Translational Research in Respiratory Medicine, University Hospital Arnau de Vilanova and Santa María, University of Lleida, IRBLleida, Lleida, Spain. <sup>7</sup>Pneumology Department, University Hospital Germans Trias i Pujol, Badalona, Spain. <sup>8</sup>Pneumology Department, University Hospital Parc Taulí, Autonomous University of Barcelona, Sabadell, Spain. <sup>9</sup>Pneumology Department, University Hospital of Guadalajara, Guadalajara, Spain. <sup>10</sup>Pneumology Department, University Hospital of Burgos, Burgos, Spain. <sup>11</sup>Pneumology Department, University Hospital of Cruces, Bizkaia, Spain. <sup>12</sup>Bioaraba Health Research Institute, University Hospital of Araba, Vitoria, Spain. <sup>13</sup>Sleep Unit, Pneumology Department, Hospital Santa Creu i Sant Pau, Barcelona, Spain. <sup>14</sup>Pneumology Department, University Hospital of Albacete, Albacete, Spain. <sup>15</sup>Pneumology Department, Clinic Hospital, Barcelona, Spain. <sup>16</sup>University Hospital Son Espases, Research Institute of Palma, Palma de Mallorca, Spain. <sup>17</sup>L. Pinilla and N. Esmaeili are co-first authors. <sup>18</sup>M. Sánchez-de-la-Torre and A. Azarbarzin contributed equally to this article as lead authors and supervised the work.

Corresponding author: Manuel Sánchez-de-la-Torre ([sanchezdelatorre@gmail.com](mailto:sanchezdelatorre@gmail.com))

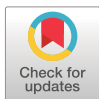

Shareable abstract (@ERSpublications)

**Hypoxic burden stands out as an obstructive sleep apnoea severity metric with potential clinical utility to identify patients most likely to benefit from continuous positive airway pressure treatment for secondary cardiovascular prevention** <https://bit.ly/3szv4hf>

**Cite this article as:** Pinilla L, Esmaeili N, Labarca G, *et al.* Hypoxic burden to guide CPAP treatment allocation in patients with obstructive sleep apnoea: a *post hoc* study of the ISAACC trial. *Eur Respir J* 2023; 62: 2300828 [DOI: 10.1183/13993003.00828-2023].

This extracted version can be shared freely online.

Copyright ©The authors 2023.

This version is distributed under the terms of the Creative Commons Attribution Non-Commercial Licence 4.0. For commercial reproduction rights and permissions contact [permissions@ersnet.org](mailto:permissions@ersnet.org)

This article has an editorial commentary: <https://doi.org/10.1183/13993003.01741-2023>

## Abstract

**Background** Hypoxic burden (HB) has emerged as a strong predictor of cardiovascular risk in obstructive sleep apnoea (OSA). We aimed to assess the potential of HB to predict the cardiovascular benefit of treating OSA with continuous positive airway pressure (CPAP).

**Methods** This was a *post hoc* analysis of the ISAACC trial (ClinicalTrials.gov: NCT01335087) including non-sleepy patients with acute coronary syndrome (ACS) diagnosed with OSA (apnoea–hypopnoea index  $\geq 15$  events·h<sup>-1</sup>) by respiratory polygraphy. Patients were randomised to CPAP or usual care and followed for a minimum of 1 year. HB was calculated as the total area under all automatically identified desaturations divided by total sleep time. Patients were categorised as having high or low baseline HB according to the median value (73.1%min·h<sup>-1</sup>). Multivariable Cox regression models were used to assess whether the effect of CPAP on the incidence of cardiovascular outcomes was dependent on the baseline HB level.

**Results** The population (362 patients assigned to CPAP and 365 patients assigned to usual care) was middle-aged (mean age 59.7 years), overweight/obese and mostly male (84.5%). A significant interaction was found between the treatment arm and the HB categories. In the high HB group, CPAP treatment was

Received: 17 May 2023  
Accepted: 27 Aug 2023

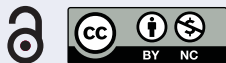

associated with a significant reduction in the incidence of cardiovascular events (HR 0.57, 95% CI 0.34–0.96). In the low HB group, CPAP-treated patients exhibited a trend toward a higher risk of cardiovascular outcomes than those receiving usual care (HR 1.33, 95% CI 0.79–2.25). The differential effect of the treatment depending on the baseline HB level followed a dose–response relationship.

**Conclusion** In non-sleepy ACS patients with OSA, high HB levels were associated with a long-term protective effect of CPAP on cardiovascular prognosis.
