# Supplementary material for: Hypoxic burden to guide CPAP treatment allocation in patients with obstructive sleep apnoea: a post hoc study of the ISAACC trial
Source: PubMed Central journal article supplement — Eur Respir J. 2023 Dec 7;62(6):2300828. doi: 10.1183/13993003.00828-2023 (PMC10701092; doi:10.1183/13993003.00828-2023), 2023-12-07
Supplement: ERJ-00828-2023.Supplement.pdf [file ERJ-00828-2023.Supplement.pdf]

## **SUPPLEMENTARY MATERIAL**

**Hypoxic Burden to Guide CPAP Treatment Allocation in Patients with  
Obstructive Sleep Apnoea: A *Post-hoc* Study of the ISAACC Trial**

**Figure S1. Cardiovascular response to CPAP treatment according to the baseline HB level and the mean adherence to the treatment.** Unadjusted Kaplan–Meier curves showing the cumulative incidence of cardiovascular events in the Usual Care group, the lower CPAP adherence group, and the higher CPAP adherence group, for **(A)** all participants, **(B)** participants with low HB, and **(C)** participants with high HB. The pre-intervention HB was categorized as “low” and “high” when  $\leq$  or  $>$  the median value (73.1 %min/h), respectively. The adherence to CPAP treatment was categorized as “lower” and “higher” when  $<$  or  $\geq$  the median value of daily use (2.3 h/day), respectively. Definitions of abbreviations: CPAP = continuous positive airway pressure; HB = hypoxic burden.

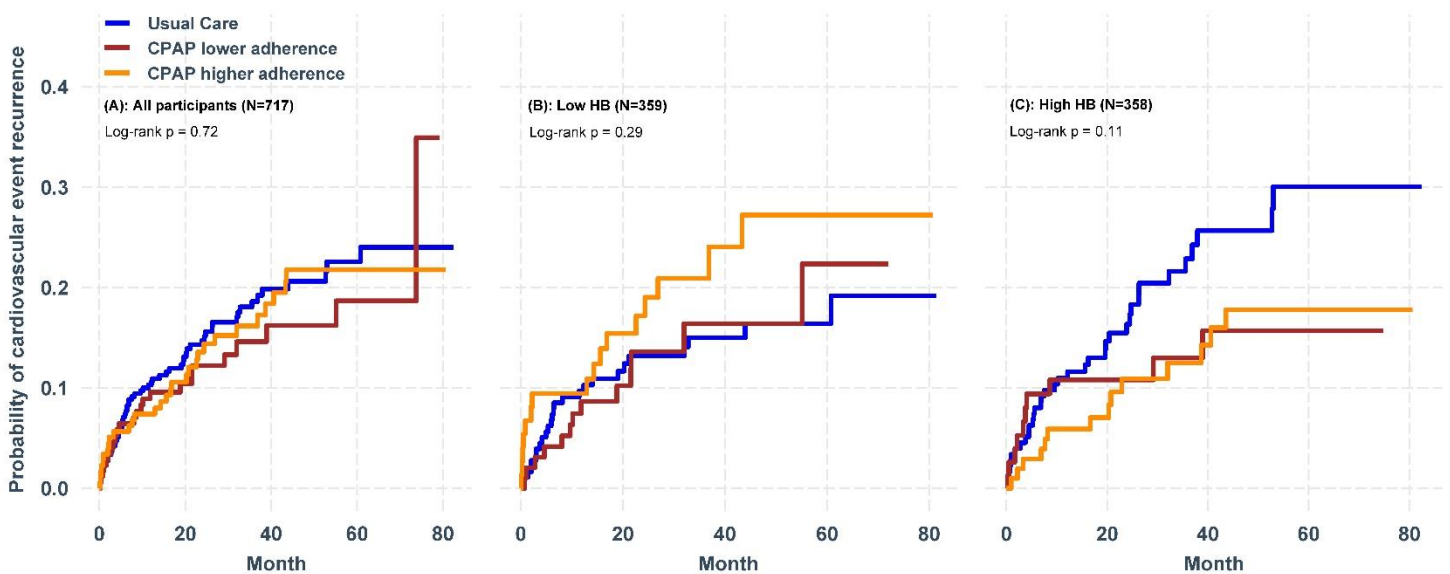

**Figure S2. Cardiovascular response to CPAP treatment according to the conventional OSA severity metrics level.** Unadjusted Kaplan–Meier curves showing the cumulative incidence of cardiovascular events in the CPAP vs. the Usual Care groups for **(A)** all participants, **(B)** participants with low OSA severity metric, and **(C)** participants with high OSA severity metric. The pre-intervention OSA severity measures were categorized as “low” and “high” when  $\leq$  or  $>$  the median values, respectively. The median values were 30.8 events/h for AHI, 27.2 events/h for ODI and 3.3% for TSat90. Definitions of abbreviations: AHI = apnoea-hypopnoea index; CPAP = continuous positive airway pressure; ODI = oxygen desaturation index; TSat90 = percent of total sleep time spent with oxygen saturation  $<90\%$ .

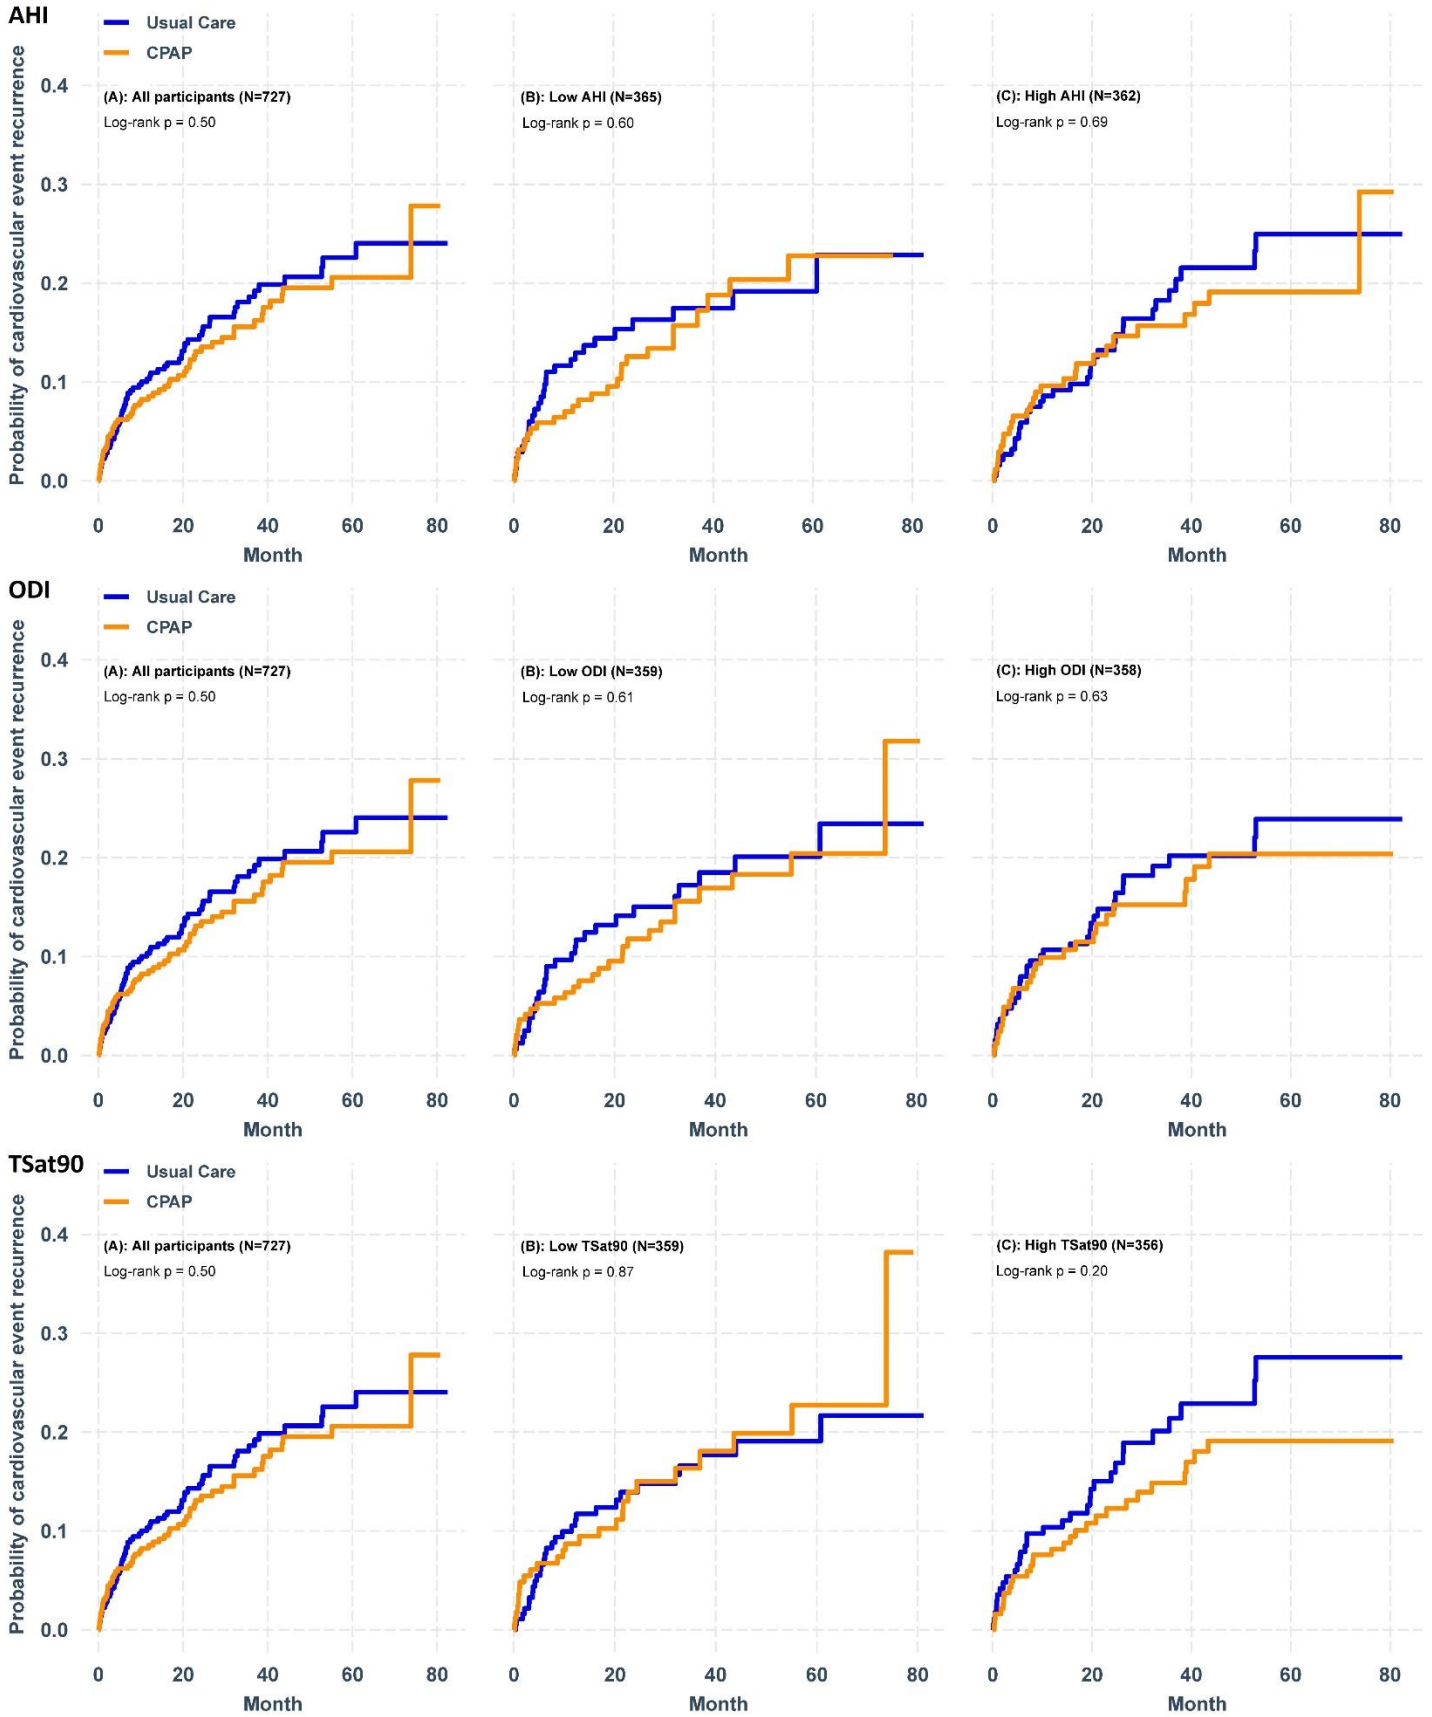

**Table S1. Characteristics of the included vs. excluded participants from the ISAACC cohort.** Data are presented as the median [p25;p75] for quantitative variables and n (%) for qualitative variables. Definitions of abbreviations: ACE = angiotensin-converting enzyme; AHI = apnoea-hypopnoea index; BMI = body mass index; CPAP = continuous positive airway pressure; CVD = cardiovascular disease; ESS = Epworth sleepiness scale; ODI = oxygen desaturation index; OSA = obstructive sleep apnoea; SaO<sub>2</sub> = oxygen saturation; TSat90 = time with SaO<sub>2</sub> <90%.

|                                          | <b>INCLUDED</b>  | <b>EXCLUDED</b>  |
|------------------------------------------|------------------|------------------|
|                                          | <b>n = 727</b>   | <b>n = 528</b>   |
| <b>Clinical data</b>                     |                  |                  |
| <b><i>Demographic/anthropometric</i></b> |                  |                  |
| Age (years)                              | 59.0 [52.5;67.0] | 60.0 [54.0;68.0] |
| Sex                                      |                  |                  |
| Male                                     | 614 (84.5%)      | 444 (84.1%)      |
| Female                                   | 113 (15.5%)      | 84 (15.9%)       |
| BMI (kg/m <sup>2</sup> )                 | 29.0 [26.4;31.9] | 29.0 [26.4;31.8] |
| <b><i>Smoking status</i></b>             |                  |                  |
| Never                                    | 173 (23.8%)      | 134 (25.4%)      |
| Former                                   | 195 (26.8%)      | 158 (29.9%)      |
| Current                                  | 359 (49.4%)      | 236 (44.7%)      |
| <b><i>Drinking status</i></b>            |                  |                  |
| Never                                    | 536 (75.6%)      | 347 (67.5%)      |
| Former                                   | 6 (0.85%)        | 7 (1.36%)        |
| Current                                  | 167 (23.6%)      | 160 (31.1%)      |
| <b><i>Comorbidities</i></b>              |                  |                  |
| Diabetes                                 | 194 (26.7%)      | 135 (25.6%)      |
| Hypertension                             | 408 (56.1%)      | 299 (56.6%)      |
| Dyslipidaemia                            | 424 (58.3%)      | 294 (55.7%)      |
| Chronic pneumopathy                      | 48 (6.60%)       | 26 (4.92%)       |
| Previous CVD                             | 141 (19.4%)      | 117 (22.2%)      |
| <b><i>Medication use</i></b>             |                  |                  |
| Insulin                                  | 37 (5.09%)       | 43 (8.14%)       |
| Oral antidiabetic drug                   | 157 (21.6%)      | 104 (19.7%)      |
| ACE inhibitors                           | 166 (22.8%)      | 134 (25.4%)      |
| Beta-blockers                            | 142 (19.5%)      | 115 (21.8%)      |
| Diuretic agents                          | 137 (18.8%)      | 93 (17.6%)       |
| Calcium-channel blockers                 | 101 (13.9%)      | 78 (14.8%)       |
| Angiotensin II receptor blockers         | 117 (16.1%)      | 90 (17.0%)       |
| Lipid-lowering drugs                     | 274 (37.7%)      | 198 (37.5%)      |
| Antiplatelet drugs                       | 164 (22.6%)      | 129 (24.4%)      |
| Anticoagulants                           | 32 (4.40%)       | 33 (6.25%)       |

|                                      |                  |                  |
|--------------------------------------|------------------|------------------|
| <b>Sleep data</b>                    |                  |                  |
| AHI (events/h)                       | 30.8 [21.0;45.8] | 32.0 [21.4;46.9] |
| ODI (events/h)                       | 27.2 [17.0;43.1] | 25.7 [14.4;40.8] |
| Mean SaO <sub>2</sub> (%)            | 93.0 [91.9;94.0] | 92.8 [91.4;94.0] |
| Minimum SaO <sub>2</sub> (%)         | 84.0 [79.0;87.0] | 83.0 [79.0;86.0] |
| TSat90 (%)                           | 3.30 [0.50;12.0] | 4.10 [0.95;16.0] |
| Somnolence (ESS)                     | 5.00 [3.00;7.00] | 6.00 [4.00;8.00] |
| <b>Treatment allocation</b>          |                  |                  |
| CPAP                                 | 362 (49.8%)      | 267 (50.6%)      |
| Usual Care                           | 365 (50.2%)      | 261 (49.4%)      |
| <b>Incidence of primary endpoint</b> |                  |                  |
| No                                   | 610 (83.9%)      | 439 (83.1%)      |
| Yes                                  | 117 (16.1%)      | 89 (16.9%)       |

**Table S2. Baseline characteristics of the study cohort by treatment allocation.** Data are presented as the median [p25;p75] for quantitative variables and n (%) for qualitative variables. Definitions of abbreviations: ACE = angiotensin-converting enzyme; AHI = apnoea-hypopnoea index; BMI = body mass index; CPAP = continuous positive airway pressure; CVD = cardiovascular disease; ESS = Epworth sleepiness scale; HB = hypoxic burden; ODI = oxygen desaturation index; OSA = obstructive sleep apnoea; SaO<sub>2</sub> = oxygen saturation; TSat90 = time with SaO<sub>2</sub> <90%.

|                                          | USUAL CARE       | CPAP TREATMENT   | p value | N   |
|------------------------------------------|------------------|------------------|---------|-----|
|                                          | n = 365          | n = 362          |         |     |
| <b>Clinical data</b>                     |                  |                  |         |     |
| <b><i>Demographic/anthropometric</i></b> |                  |                  |         |     |
| Age (years)                              | 59.0 [53.0;67.0] | 59.0 [52.0;66.8] | 0.314   | 727 |
| Sex                                      |                  |                  | 0.508   | 727 |
| Male                                     | 312 (85.5%)      | 302 (83.4%)      |         |     |
| Female                                   | 53 (14.5%)       | 60 (16.6%)       |         |     |
| BMI (kg/m <sup>2</sup> )                 | 29.1 [26.5;31.8] | 28.7 [26.2;32.0] | 0.429   | 716 |
| <b><i>Smoking status</i></b>             |                  |                  | 0.687   | 727 |
| Never                                    | 86 (23.6%)       | 87 (24.0%)       |         |     |
| Former                                   | 103 (28.2%)      | 92 (25.4%)       |         |     |
| Current                                  | 176 (48.2%)      | 183 (50.6%)      |         |     |
| <b><i>Drinking status</i></b>            |                  |                  | 0.367   | 709 |
| Never                                    | 274 (77.4%)      | 262 (73.8%)      |         |     |
| Former                                   | 4 (1.13%)        | 2 (0.56%)        |         |     |
| Current                                  | 76 (21.5%)       | 91 (25.6%)       |         |     |
| <b><i>Comorbidities</i></b>              |                  |                  |         |     |
| Diabetes                                 | 88 (24.1%)       | 106 (29.3%)      | 0.136   | 727 |
| Hypertension                             | 206 (56.4%)      | 202 (55.8%)      | 0.922   | 727 |
| Dyslipidaemia                            | 205 (56.2%)      | 219 (60.5%)      | 0.267   | 727 |
| Chronic pneumopathy                      | 27 (7.40%)       | 21 (5.80%)       | 0.473   | 727 |
| Previous CVD                             | 71 (19.5%)       | 70 (19.3%)       | 1.000   | 727 |
| <b><i>Medication use</i></b>             |                  |                  |         |     |
| Insulin                                  | 18 (4.93%)       | 19 (5.25%)       | 0.979   | 727 |
| Oral antidiabetic drug                   | 72 (19.7%)       | 85 (23.5%)       | 0.254   | 727 |
| ACE inhibitors                           | 88 (24.1%)       | 78 (21.5%)       | 0.463   | 727 |
| Beta-blockers                            | 74 (20.3%)       | 68 (18.8%)       | 0.680   | 727 |
| Diuretic agents                          | 68 (18.6%)       | 69 (19.1%)       | 0.957   | 727 |
| Calcium-channel blockers                 | 56 (15.3%)       | 45 (12.4%)       | 0.304   | 727 |
| Angiotensin II receptor blockers         | 54 (14.8%)       | 63 (17.4%)       | 0.392   | 727 |
| Lipid-lowering drugs                     | 129 (35.3%)      | 145 (40.1%)      | 0.217   | 727 |
| Antiplatelet drugs                       | 82 (22.5%)       | 82 (22.7%)       | 1.000   | 727 |
| Anticoagulants                           | 17 (4.66%)       | 15 (4.14%)       | 0.875   | 727 |

| Sleep data                   |                  |                  |       |     |
|------------------------------|------------------|------------------|-------|-----|
| AHI (events/h)               | 32.7 [20.8;45.4] | 29.8 [21.2;46.2] | 0.835 | 727 |
| ODI (events/h)               | 29.8 [17.5;44.5] | 25.6 [16.8;42.2] | 0.088 | 717 |
| Mean SaO <sub>2</sub> (%)    | 93.0 [91.9;94.1] | 93.0 [91.9;94.0] | 0.591 | 723 |
| Minimum SaO <sub>2</sub> (%) | 84.0 [79.0;87.0] | 83.0 [79.0;87.0] | 0.316 | 719 |
| TSat90 (%)                   | 2.90 [0.40;12.0] | 3.70 [0.70;11.9] | 0.293 | 715 |
| HB (%min/h)                  | 70.9 [49.9;104]  | 74.5 [53.9;103]  | 0.270 | 727 |
| Somnolence (ESS)             | 5.00 [3.00;7.00] | 5.00 [3.00;7.00] | 0.670 | 727 |



**Table S3. Baseline characteristics of the study cohort by categories of baseline HB.** Data are presented as the median [p25;p75] for quantitative variables and n (%) for qualitative variables. Significant p values ( $p < 0.05$ ) are presented in bold. Definitions of abbreviations: ACE = angiotensin-converting enzyme; AHI = apnoea-hypopnoea index; BMI = body mass index; CPAP = continuous positive airway pressure; CVD = cardiovascular disease; ESS = Epworth sleepiness scale; HB = hypoxic burden; ODI = oxygen desaturation index; OSA = obstructive sleep apnoea; SaO<sub>2</sub> = oxygen saturation; TSat90 = time with SaO<sub>2</sub> <90%.

|                                          | Low HB<br>(HB ≤73.1 %min/h) | High HB<br>(HB >73.1 %min/h) | p value          |
|------------------------------------------|-----------------------------|------------------------------|------------------|
|                                          | n = 364                     | n = 363                      |                  |
| <b>Clinical data</b>                     |                             |                              |                  |
| <b><i>Demographic/anthropometric</i></b> |                             |                              |                  |
| Age (years)                              | 60.0 [53.0;67.0]            | 59.0 [52.0;67.0]             | 0.849            |
| Sex                                      |                             |                              | 0.55             |
| Male                                     | 60 (16.5%)                  | 53 (14.6%)                   |                  |
| Female                                   | 304 (83.5%)                 | 310 (85.4%)                  |                  |
| BMI (kg/m <sup>2</sup> )                 | 28.1 [25.5;30.8]            | 29.8 [27.3;32.9]             | <b>&lt;0.001</b> |
| <b><i>Smoking status</i></b>             |                             |                              | 0.904            |
| Never                                    | 87 (23.9%)                  | 86 (23.7%)                   |                  |
| Former                                   | 95 (26.1%)                  | 100 (27.5%)                  |                  |
| Current                                  | 182 (50.0%)                 | 177 (48.8%)                  |                  |
| <b><i>Drinking status</i></b>            |                             |                              | 0.934            |
| Never                                    | 266 (75.1%)                 | 270 (76.1%)                  |                  |
| Former                                   | 3 (0.85%)                   | 3 (0.85%)                    |                  |
| Current                                  | 85 (24.0%)                  | 82 (23.1%)                   |                  |
| <b><i>Comorbidities</i></b>              |                             |                              |                  |
| Diabetes                                 | 90 (24.7%)                  | 104 (28.7%)                  | 0.266            |
| Hypertension                             | 192 (52.7%)                 | 216 (59.5%)                  | 0.078            |
| Dyslipidemia                             | 214 (58.8%)                 | 210 (57.9%)                  | 0.856            |
| Chronic pneumopathy                      | 24 (6.59%)                  | 24 (6.61%)                   | 1.000            |
| Previous CVD                             | 62 (17.0%)                  | 79 (21.8%)                   | 0.129            |
| <b><i>Medication use</i></b>             |                             |                              |                  |
| Insulin                                  | 13 (3.57%)                  | 24 (6.61%)                   | 0.090            |
| Oral antidiabetic drug                   | 67 (18.4%)                  | 90 (24.8%)                   | <b>0.045</b>     |
| ACE inhibitors                           | 81 (22.3%)                  | 85 (23.4%)                   | 0.775            |
| Beta-blockers                            | 65 (17.9%)                  | 77 (21.2%)                   | 0.295            |
| Diuretic agents                          | 65 (17.9%)                  | 72 (19.8%)                   | 0.557            |
| Calcium-channel blockers                 | 43 (11.8%)                  | 58 (16.0%)                   | 0.129            |
| Angiotensin II receptor blockers         | 52 (14.3%)                  | 65 (17.9%)                   | 0.220            |

|                              |                  |                  |                  |
|------------------------------|------------------|------------------|------------------|
| Lipid-lowering drugs         | 127 (34.9%)      | 147 (40.5%)      | 0.138            |
| Antiplatelet drugs           | 79 (21.7%)       | 85 (23.4%)       | 0.643            |
| Anticoagulants               | 16 (4.40%)       | 16 (4.41%)       | 1                |
| <b>Sleep data</b>            |                  |                  |                  |
| AHI (events/h)               | 22.8 [17.7;31.2] | 42.7 [30.6;57.5] | <b>&lt;0.001</b> |
| ODI (events/h)               | 18.4 [13.6;25.6] | 39.6 [29.3;52.8] | <b>&lt;0.001</b> |
| Mean SaO <sub>2</sub> (%)    | 93.6 [92.2;94.6] | 92.6 [91.1;93.6] | <b>&lt;0.001</b> |
| Minimum SaO <sub>2</sub> (%) | 86.0 [81.5;88.0] | 82.0 [77.0;85.0] | <b>&lt;0.001</b> |
| TSat90 (%)                   | 0.90 [0.10;4.77] | 7.20 [2.10;24.6] | <b>&lt;0.001</b> |
| HB (%min/h)                  | 51.8 [41.1;62.2] | 104 [84.8;140]   | <b>&lt;0.001</b> |
| Somnolence (ESS)             | 4.00 [3.00;6.00] | 5.00 [3.00;8.00] | <b>&lt;0.001</b> |
